# Supplementary material
Source: PubMed Central journal article supplement (PMC3129419)

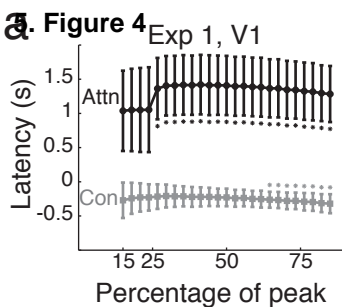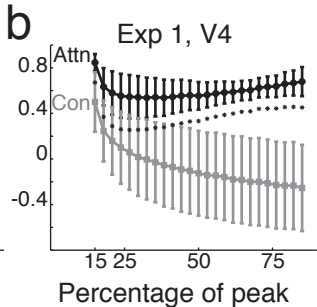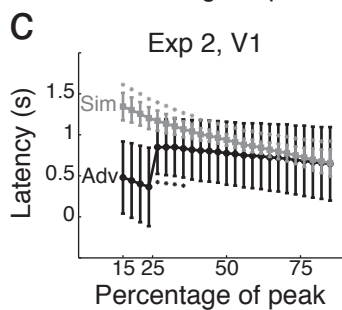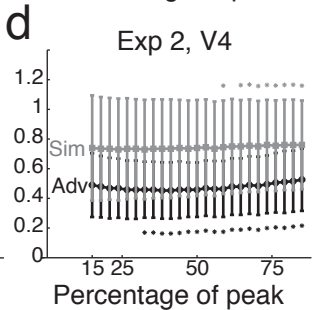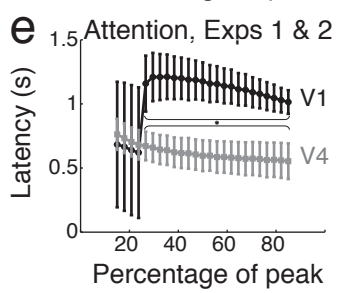

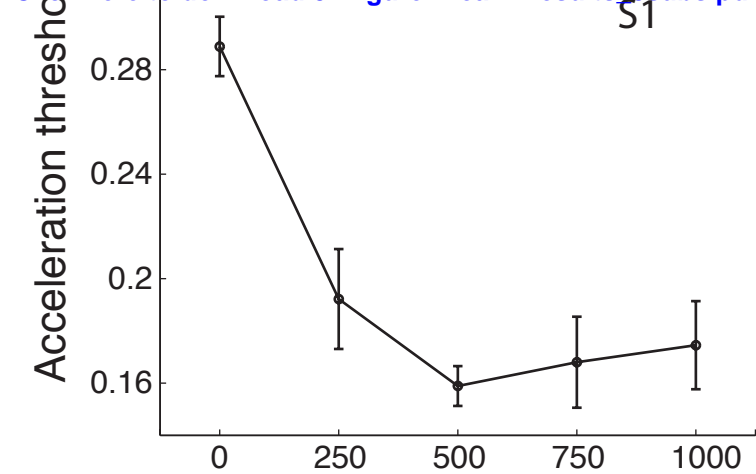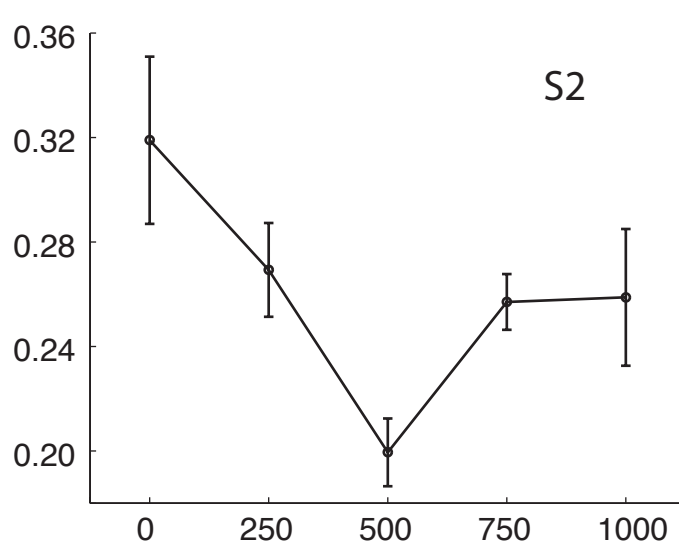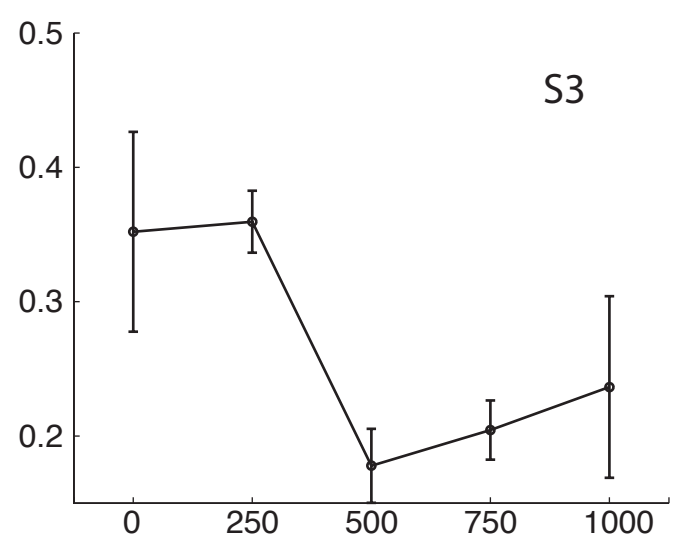

Supplement: NIHMS303377-supplement-01.pdf [file NIHMS303377-supplement-01.pdf]
